# Supplementary material
Source: publisher site journal article supplement (https://www.dovepress.com/get_supplementary_file.php?f=252074.docx)
Supplement: Supplementary file 1 [file get_supplementary_file.php]

Mimicking the Endometrial Cancer Tumor Microenvironment to Reprogram Tumor-Associated Macrophages in Disintegrable Supramolecular Gelatin Hydrogel

Yujia Huang1,2,#, Qian Feng3,#, Huabo Jiang1, #, Wanding Zhou1,2, Jinhong Chen2, Jie Gao4, Kai Wang1, Xiaoping Wan2,*, Yongsheng Yu1,*

1 Clinical and Translational Research Center, Shanghai First Maternity and Infant Hospital, Tongji University School of Medicine, Shanghai, China

2 Department of Gynecology, Shanghai First Maternity and Infant Hospital, Tongji University School of Medicine, Shanghai, China

3 Fujian Provincial Key Laboratory of Advanced Materials Oriented Chemical Engineering, College of Chemistry and Materials Science, Fujian Normal University, Fuzhou, China

4 Institute of translational medicine, Shanghai university, Shanghai, China

*Corresponding authors: Xiaoping Wan, E-mail: [wanxiaoping61@126.com](mailto:wanxiaoping61@126.com); Yongsheng Yu, E-mail: [yongshengyu@tongji.edu.cn](mailto:yongshengyu@tongji.edu.cn%20) .

# contributed equally to this paper.


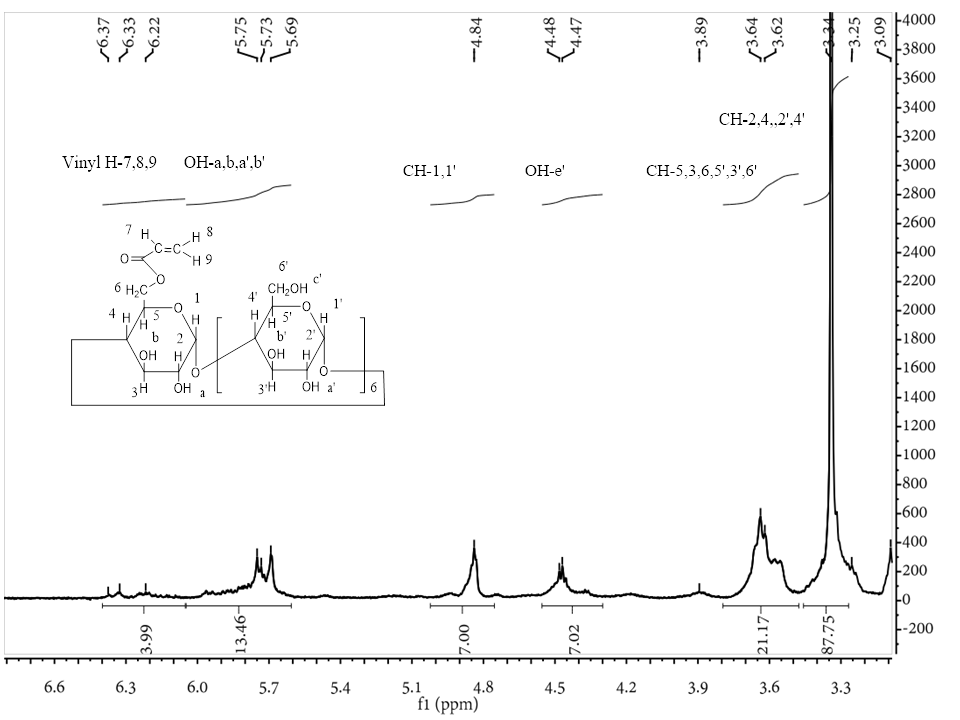


Supporting information Figure 1. The 1H NMR spectrum of Ac-β-CD. The substitution degree (SD) of Ac-β-CD is defined as 1.3.

Supporting information Figure 2. (A)The formed cell heterasheroids of 10C5M model (cancer cells/macrophage cells) in 2D and in hydrogel Scale bar 500 μm. (B) The 10C5M model of blank control cells treated by PBS (Blank) and the obtained cells after gel dissociation by ADA (Treatment) were cultured overnight. The images were captured Under a microscope with a 10×objective. Scale bar 50 μm. (C) The CCK-8 assay was performed after the two groups’ cells 48 h incubation. *p*>0.05. (D) Reprogram M2 macrophages inhibited cell proliferation after 48 h incubation in a CCK-8 assay. Quantification of the relative cancer cells proliferation in different models. Data are presented as means ± standard deviations (n = 3). **p* < 0.05, ***p* < 0.01.

.
